# Supplementary material for: Self-template synthesis of hierarchical magnetic porous carbon fibers derived from Fe(BTC)-coated bamboo fibers for fast removal of methylene blue
Source: Royal Society of Chemistry journal article supplement (doi:10.1039/c5ra16589j), 2015-01-01
Supplement: c5ra16589j1.pdf [file c5ra16589j1.pdf]

# Self-template synthesis of hierarchical magnetic porous carbon fibers derived from Fe(BTC)-coated bamboo fibers for fast removal of methylene blue

Chao Bao<sup>1a</sup>, Junjun Ma<sup>1a</sup>, Lincheng Zhou<sup>\*a</sup>, Yanming Shao<sup>a</sup>, Qiong Wu<sup>a</sup>, Fei Wang<sup>b</sup>

*<sup>a</sup>State Key Laboratory of Applied Organic Chemistry, College of Chemistry and Chemical Engineering, Institute of Biochemical Engineering & Environmental Technology, Lanzhou University, Lanzhou 730000, P. R. China*

*<sup>b</sup>Changjiang Engineering Supervision Consulting Co. Ltd, Wuhan 430010, P. R. China*

Chao Bao E-mail: baoch13@lzu.edu.cn Fax: 86-931-8912113 Tel. 86-931-8912528

Address: College of Chemistry and Chemical Engineering, Lanzhou University, Lanzhou 730000, P.R.China

Junjun Ma E-mail: majj12@lzu.edu.cn Fax: 86-931-8912113 Tel. 86-931-8912528

Address: College of Chemistry and Chemical Engineering, Lanzhou University, Lanzhou 730000, P.R.China

Lincheng Zhou E-mail: zhoulc@lzu.edu.cn Fax: 86-931-8912113 Tel. 86-931-8912528

Address: College of Chemistry and Chemical Engineering, Lanzhou University, Lanzhou 730000, P.R.China

Yanming Shao E-mail: shaoym11@lzu.edu.cn Fax: 86-931-8912113 Tel. 86-931-8912528

Address: College of Chemistry and Chemical Engineering, Lanzhou University, Lanzhou 730000, P.R.China

Qiong Wu E-mail: qwu14@lzu.edu.cn Fax: 86-931-8912113 Tel. 86-931-8912528

Address: College of Chemistry and Chemical Engineering, Lanzhou University, Lanzhou 730000, P.R.China

Fei Wang E-mail: 41103045@qq.com Fax: 86-931-8912113 Tel. 86-931-8912528

Address: Changjiang Engineering Supervision Consulting Co. Ltd, Wuhan 430010, P.R.China

---

\*Corresponding author. Tel: 86-931-8912528. E-mail: Zhoulc@lzu.edu.cn (Zhou lincheng)

<sup>1</sup>These authors contributed equally to this work.

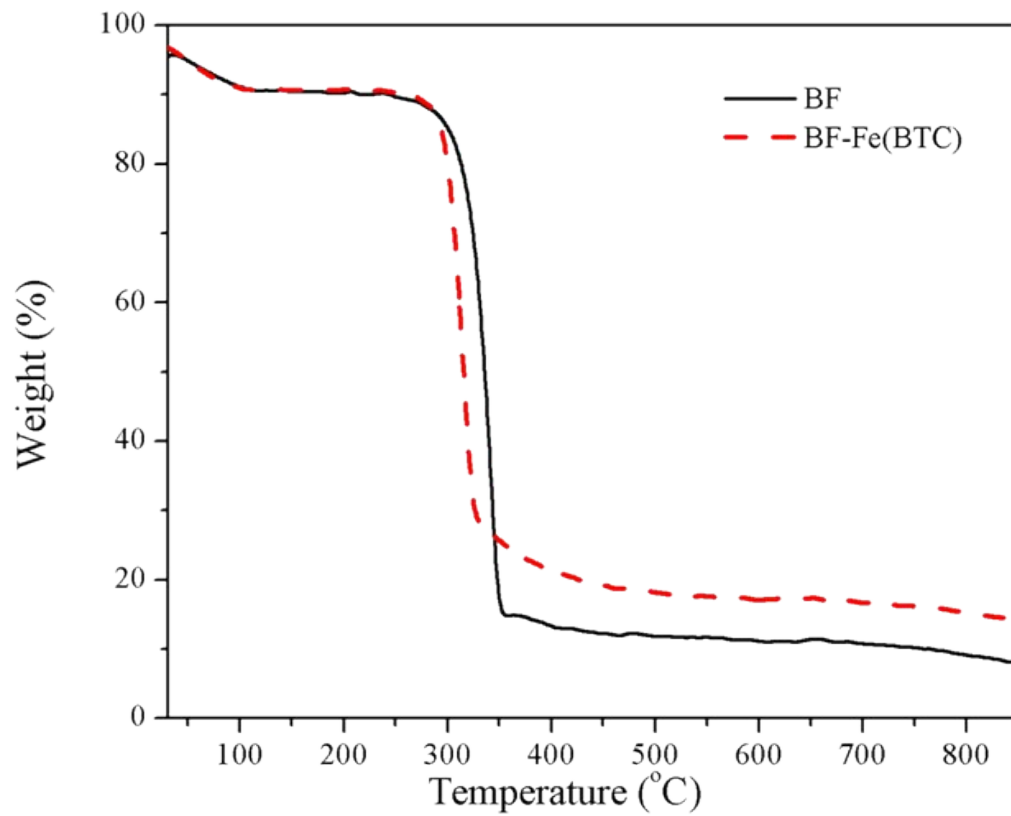

Fig. S1 TGA thermograms of BF and BF-Fe(BTC).

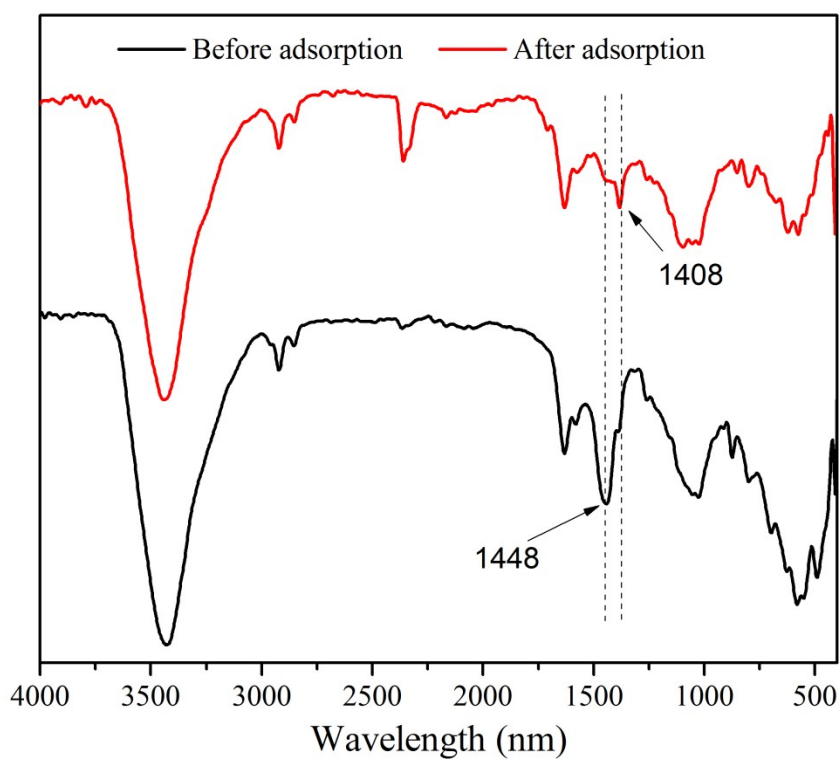

Fig. S2 FT-IR spectra of MBF-900 and MBF-900.

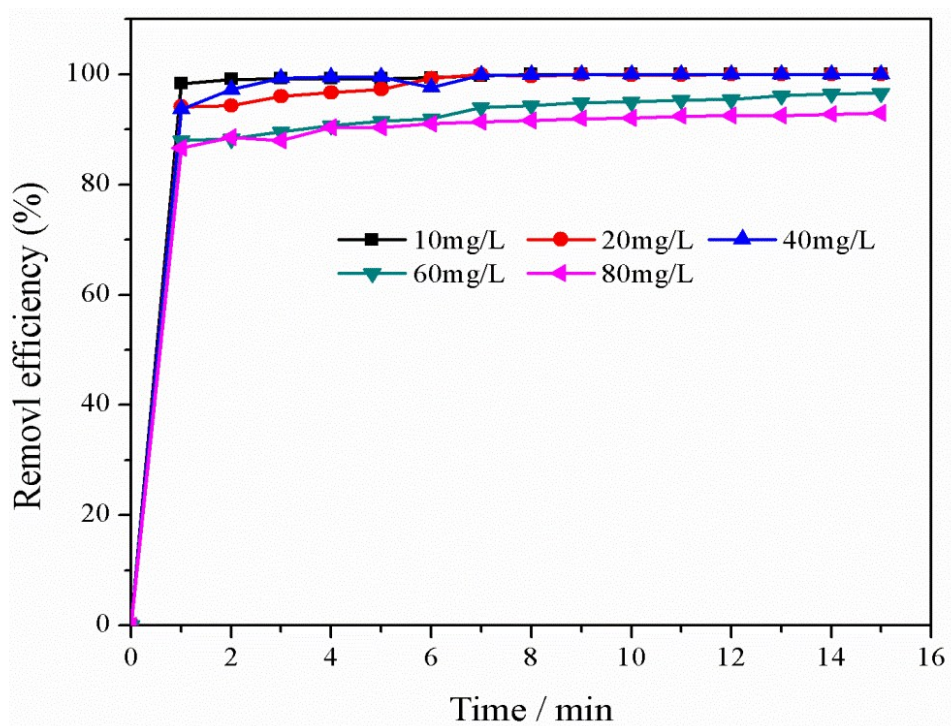

Fig. S3 Effect of MB concentration for absorption.
